# Supplementary material
Source: Springer Nature journal article supplement (https://www.springermedizin.de/resource/supplementary/13229_2012_67_MOESM3_ESM.pdf/9676090)
Supplement: MOESM3 [file 9676090]

Additional Table 3. Absorbance data of PM-M1 to M4 plates for the first 18 controls (C1-C18) and 15 patients with different conditions characterized by ID (N1-N15).

| Substrate     | C1    | C2    | C3    | C4    | C5    | C6    | C7    | C8    | C9    | C10   | C11   | C12   | C13   | C14   | C15   | C16   | C17   | C18   | N1    | N2    | N3    | N4    | N5    | N6    | N7    | N8    | N9    | N10   | N11   | N12   | N13   | N14   | N15      | Pvalue  |
|---------------|-------|-------|-------|-------|-------|-------|-------|-------|-------|-------|-------|-------|-------|-------|-------|-------|-------|-------|-------|-------|-------|-------|-------|-------|-------|-------|-------|-------|-------|-------|-------|-------|----------|---------|
| The-Ser       | -0.24 | -1.81 | -2.13 | -1.35 | -2.98 | -0.59 | -2.65 | -2.55 | -1.46 | -1.73 | -1.73 | -2.69 | -1.94 | -1.86 | -1.75 | -1.31 | -1.43 | -1.74 | -1.45 | -1.73 | -1.31 | -2.22 | -0.88 | -0.47 | -1.50 | -0.28 | -0.95 | -1.33 | -1.36 | -1.50 | -1.14 | -0.77 | 0.00064  |         |
| Val-Ser       | -1.20 | -1.94 | -2.77 | -2.97 | -2.35 | -2.59 | -2.50 | -2.91 | -3.10 | -2.20 | -2.66 | -2.01 | -2.10 | -1.97 | -2.20 | -1.52 | -2.19 | -1.68 | -1.51 | -0.66 | -2.53 | -1.79 | -0.41 | -1.52 | -1.04 | -1.10 | -1.38 | -1.46 | -1.43 | -0.75 | -0.97 | -1.29 | 0.00094  |         |
| Gln-Gly       | -0.65 | -0.59 | -1.18 | -1.07 | -3.16 | -2.21 | -1.96 | -3.59 | -2.66 | -2.74 | -3.01 | -3.28 | -2.53 | -2.15 | -2.13 | -2.21 | -2.46 | -2.71 | -0.88 | -3.31 | -0.59 | -2.71 | -1.72 | -0.10 | -0.73 | -0.61 | -3.30 | -1.03 | -1.40 | -0.60 | -0.40 | -0.73 | 0.12     | 0.00090 |
| Thr-Pro       | -2.81 | -1.73 | -2.71 | -1.71 | -3.46 | -2.51 | -2.78 | -2.56 | -1.20 | -1.82 | -1.82 | -2.51 | -2.03 | -1.97 | -2.01 | -1.76 | -1.69 | -2.37 | -1.75 | -1.87 | -1.38 | -2.55 | -1.09 | -0.66 | -1.62 | -1.22 | -1.45 | -1.56 | -1.71 | -1.56 | -0.64 | -1.53 | -0.89    | 0.00228 |
| Arg-Phe       | -1.43 | -2.18 | -2.92 | -2.05 | -2.75 | -2.44 | -2.33 | -2.78 | -2.05 | -2.77 | -2.44 | -3.21 | -2.56 | -2.65 | -2.06 | -2.25 | -1.95 | -1.87 | -1.49 | -2.11 | -1.13 | -1.36 | -1.98 | -0.99 | -1.99 | -1.00 | -0.94 | -1.06 | -1.35 | -1.56 | -0.66 | -0.66 | -1.11    | 0.00298 |
| Arg-Ala       | -1.73 | -2.05 | -2.47 | -1.52 | -2.32 | -2.39 | -1.96 | -2.31 | -1.84 | -2.52 | -1.93 | -2.77 | -2.36 | -2.21 | -1.69 | -0.89 | -1.47 | -1.60 | -1.25 | -1.61 | -1.37 | -2.63 | -1.63 | -0.68 | -1.77 | 0.18  | -0.49 | -1.18 | -1.37 | -1.28 | -0.45 | -0.58 | -0.83    | 0.00309 |
| Ser-Asn       | -2.22 | -1.78 | -2.13 | -1.49 | -3.15 | -2.41 | -2.51 | -2.72 | -1.22 | -1.76 | -1.76 | -2.41 | -1.86 | -2.03 | -1.45 | -1.43 | -1.37 | -1.76 | -1.30 | -1.42 | -0.89 | -2.43 | -1.91 | -0.35 | -1.67 | -0.42 | -1.03 | -1.22 | -1.36 | -1.49 | -0.42 | -1.08 | -0.94    | 0.00363 |
| Gln-Glu       | -0.60 | -0.51 | -0.99 | -0.08 | -3.16 | -2.66 | -2.12 | -3.18 | -1.20 | -2.99 | -3.06 | -3.20 | -2.15 | -2.20 | -2.40 | -1.50 | -2.40 | -2.31 | -1.08 | -2.31 | -0.66 | -2.67 | -2.37 | 0.69  | -0.29 | 0.24  | 0.54  | -0.17 | -0.92 | -0.08 | 0.91  | -0.10 | 0.25     | 0.00417 |
| Ser-Val       | -1.89 | -2.01 | -2.34 | -1.65 | -3.11 | -2.73 | -2.63 | -3.00 | -1.42 | -2.00 | -2.48 | -2.11 | -2.22 | -2.04 | -1.57 | -1.56 | -2.05 | -2.01 | -1.60 | -1.63 | -1.13 | -2.51 | -2.70 | 0.72  | -1.76 | -0.81 | -1.56 | -1.38 | -1.53 | -1.44 | -0.56 | -1.20 | 0.10     | 0.00467 |
| Ala-Arg       | -2.21 | -1.95 | -2.73 | -2.64 | -2.69 | -2.26 | -2.09 | -3.01 | -1.82 | -2.56 | -2.08 | -2.93 | -2.37 | -2.35 | -2.08 | -1.23 | -1.57 | -1.67 | -1.66 | -2.11 | -1.43 | -2.71 | -2.15 | -0.86 | -2.13 | -0.14 | -0.86 | -1.25 | -1.43 | -1.44 | -0.78 | -0.96 | -1.19    | 0.00515 |
| Ser-His       | -1.65 | -1.62 | -2.38 | -1.60 | -3.37 | -2.10 | -2.48 | -2.63 | -1.74 | -2.18 | -2.18 | -2.90 | -2.37 | -2.16 | -1.78 | -1.18 | -1.26 | -1.44 | -1.51 | -2.13 | -1.28 | -2.51 | -1.60 | -0.67 | -1.80 | -0.88 | -0.72 | -1.24 | -1.43 | -1.40 | -0.74 | -0.90 | -0.76    | 0.00625 |
| Ser-Glu       | -2.68 | -1.62 | -2.47 | -2.01 | -3.37 | -2.70 | -2.60 | -3.51 | -1.11 | -1.81 | -2.24 | -2.04 | -2.34 | -2.16 | -2.10 | -1.98 | -2.45 | -1.71 | -1.03 | -1.08 | -2.42 | -2.92 | -0.39 | -1.82 | -1.19 | -1.60 | -1.31 | -1.76 | -1.53 | -0.59 | -1.49 | -1.16 | 0.00750  |         |
| Thr-Met       | -3.07 | -2.18 | -2.91 | -1.28 | -2.34 | -2.54 | -2.63 | -2.27 | -1.66 | -2.14 | -2.14 | -2.26 | -2.28 | -2.23 | -1.91 | -1.37 | -1.92 | -1.99 | -1.73 | -2.10 | -2.03 | -2.64 | -1.90 | -1.59 | -1.92 | -1.67 | -1.74 | -1.64 | -1.61 | -0.77 | -1.68 | -1.00 | 0.00824  |         |
| Ser-Met       | -3.38 | -2.06 | -2.89 | -2.06 | -3.01 | -2.70 | -3.02 | -2.93 | -1.87 | -2.34 | -2.34 | -2.91 | -2.47 | -2.43 | -1.95 | -1.62 | -1.94 | -1.98 | -1.93 | -2.22 | -1.78 | -2.85 | -2.81 | -1.15 | -1.76 | -1.70 | -1.47 | -1.60 | -1.74 | -1.62 | -1.26 | -1.64 | -1.20    | 0.00825 |
| Thymidine     | -0.44 | -1.47 | -1.40 | -1.19 | -1.82 | -1.03 | -0.65 | -1.54 | -2.26 | -3.15 | -3.15 | -2.17 | -3.22 | -1.86 | -1.96 | -1.40 | -1.67 | -1.03 | -0.97 | -0.91 | -1.81 | -0.77 | -2.54 | -0.75 | -0.38 | -0.85 | 0.17  | 0.00  | -0.46 | -1.03 | -0.94 | -0.24 | -0.87    | 0.00876 |
| Ser-Gln       | -0.02 | -0.30 | -0.43 | 0.28  | -3.37 | -1.04 | -0.66 | -1.06 | 0.04  | -0.66 | -0.66 | -1.33 | -0.68 | -0.43 | -0.28 | -0.13 | -0.92 | -1.05 | 0.21  | 0.03  | 0.15  | -0.95 | -0.68 | 0.01  | -0.22 | 0.00  | 0.53  | -0.13 | -0.71 | 0.07  | 1.00  | 0.20  | 0.11     | 0.01017 |
| Leu-Phe       | -1.25 | -2.24 | -3.01 | -2.56 | -2.32 | -2.00 | -1.30 | -3.37 | -2.16 | -2.53 | -2.53 | -3.32 | -2.80 | -2.81 | -2.38 | -1.05 | -2.05 | -1.20 | -1.24 | -1.91 | -2.58 | -2.34 | -1.54 | -0.83 | -2.15 | -0.20 | -0.84 | -0.79 | -1.25 | -1.50 | -0.62 | -0.58 | -1.11    | 0.01162 |
| Ala-His       | -2.10 | -2.02 | -2.44 | -1.94 | -2.77 | -2.05 | -2.26 | -2.66 | -1.65 | -1.84 | -3.07 | -1.18 | -2.29 | -2.15 | -1.23 | -1.37 | -1.99 | -1.55 | -1.79 | -1.93 | -2.57 | -2.62 | -3.00 | -1.79 | -0.48 | -0.92 | -1.06 | -1.38 | -1.43 | -0.54 | -1.44 | -0.96 | -0.61    | 0.01212 |
| Lysine        | -2.91 | -1.43 | -2.64 | -2.82 | -3.07 | -2.58 | -3.46 | -3.43 | -1.45 | -1.64 | -2.65 | -1.85 | -2.45 | -2.64 | -2.69 | -1.55 | -1.44 | -2.74 | -1.74 | -1.43 | -1.22 | -2.02 | -2.77 | -0.77 | -1.62 | -2.43 | -1.67 | -1.70 | -1.92 | -1.56 | -0.65 | -2.00 | -1.14    | 0.01235 |
| Arg-Arg       | -1.13 | -1.57 | -1.99 | -1.38 | -2.02 | -1.48 | -1.36 | -1.86 | -1.40 | -2.04 | -1.56 | -2.47 | -1.91 | -1.97 | -1.25 | -1.33 | -1.17 | -1.25 | -1.11 | -1.59 | -0.87 | -2.40 | -1.02 | -0.31 | -1.51 | 0.47  | -0.06 | -0.64 | -1.17 | -1.23 | -1.19 | -0.33 | -0.74    | 0.01262 |
| Ser-Asp       | -2.40 | -1.93 | -2.47 | -1.59 | -3.41 | -2.46 | -2.73 | -2.65 | -1.35 | -2.02 | -2.52 | -2.54 | -2.03 | -2.11 | -1.98 | -1.47 | -1.52 | -1.95 | -1.47 | -1.25 | -1.66 | -2.56 | -2.63 | -0.55 | -1.79 | -0.75 | -1.21 | -1.30 | -1.58 | -1.60 | -1.47 | -1.50 | -1.16    | 0.01290 |
| Succinic Acid | -2.93 | -3.00 | -1.96 | -1.63 | -3.06 | -2.62 | -0.94 | -2.27 | -0.60 | -1.68 | -2.51 | -1.64 | -1.69 | -1.55 | -2.34 | -1.63 | -1.45 | -2.25 | -0.43 | -2.01 | -0.52 | -2.06 | -2.21 | 0.31  | -0.83 | 0.15  | -0.66 | -2.03 | -1.31 | -1.47 | 0.10  | 0.31  | -0.61    | 0.01445 |
| Acetic Acid   | -1.04 | -1.19 | -1.87 | -1.37 | -1.93 | -1.46 | -0.61 | -2.14 | -0.98 | -1.75 | -1.36 | -2.42 | -1.49 | -1.60 | -1.75 | -0.77 | -1.17 | -1.51 | -1.14 | -1.45 | -0.44 | -2.41 | -0.48 | -0.33 | -1.07 | 0.31  | 0.23  | -1.08 | -1.09 | -0.84 | 0.04  | 0.29  | -0.53    | 0.01519 |
| Arg-Lys       | -0.73 | -1.78 | -2.17 | -1.55 | -2.12 | -1.56 | -1.54 | -2.14 | -0.68 | -1.54 | -2.62 | -1.97 | -1.94 | -1.75 | -0.99 | -1.33 | -1.34 | -1.19 | -1.65 | -0.97 | -2.72 | -1.11 | -0.33 | -1.74 | 0.32  | -0.32 | -0.68 | -1.19 | -1.19 | -0.32 | -0.26 | -0.63 | 0.01554  |         |
| Leucine       | -1.49 | -2.15 | -2.74 | -1.98 | -2.63 | -1.67 | -1.87 | -2.63 | -1.70 | -2.47 | -2.16 | -2.79 | -2.20 | -2.37 | -1.98 | -0.91 | -1.25 | -1.22 | -1.19 | -1.97 | -1.24 | -2.78 | -1.59 | -0.82 | -1.88 | -0.25 | -0.76 | -0.84 | -1.44 | -1.53 | -0.72 | -0.80 | -1.42    | 0.01605 |
| Malic Acid    | -2.42 | -1.62 | -2.17 | -2.50 | -3.13 | -2.97 | -1.66 | -2.61 | -1.15 | -2.02 | -2.31 | -1.85 | -1.67 | -2.32 | -1.34 | -1.11 | -2.21 | -1.29 | -2.24 | -1.08 | -2.06 | -2.51 | -0.35 | -1.03 | -1.40 | -1.36 | -1.48 | -1.76 | -1.33 | -0.22 | 0.12  | -0.74 | 0.01755  |         |
| His-Leu       | -1.33 | -1.95 | -2.19 | -1.80 | -3.37 | -1.75 | -1.88 | -2.53 | -1.85 | -2.34 | -2.34 | -3.06 | -2.19 | -2.53 | -2.10 | -0.88 | -1.34 | -1.12 | -1.16 | -1.99 | -2.04 | -2.41 | -1.43 | -0.71 | -1.77 | -1.19 | -0.86 | -0.94 | -1.51 | -1.47 | -0.50 | -0.93 | -1.30    | 0.01778 |
| Ser-Pro       | -2.85 | -1.79 | -2.59 | -2.01 | -2.95 | -2.62 | -2.63 | -2.53 | -1.24 | -1.95 | -1.95 | -2.21 | -2.05 | -1.99 | -2.03 | -0.88 | -1.63 | -2.27 | -1.60 | -1.70 | -2.14 | -2.50 | -2.83 | -0.63 | -1.80 | -0.80 | -1.41 | -1.39 | -1.63 | -1.56 | -0.75 | -1.67 | -0.86    | 0.01823 |
| Histidine     | -2.20 | -1.66 | -2.45 | -1.95 | -3.70 | -3.01 | -2.69 | -2.72 | -1.43 | -2.24 | -1.84 | -2.49 | -1.91 | -1.72 | -2.23 | -1.50 | -1.37 | -2.40 | -1.35 | -1.18 | -1.29 | -2.11 | -0.80 | -0.40 | -1.74 | -0.88 | -0.35 | -1.76 | -1.64 | -1.29 | -0.37 | -1.70 | -0.85    | 0.01875 |
| Pro-Ser       | -2.22 | -1.41 | -2.52 | -1.89 | -2.99 | -2.09 | -2.42 | -2.58 | -1.30 | -2.12 | -2.12 | -2.82 | -2.07 | -2.32 | -1.58 | -1.02 | -1.48 | -1.31 | -1.14 | -1.50 | -1.10 | -2.74 | -1.69 | -0.93 | -1.65 | -0.22 | -0.64 | -0.94 | -1.12 | -1.31 | -0.70 | -0.42 | 0.01921  |         |
| Alaninamide   | -2.29 | -2.40 | -2.94 | -2.40 | -3.16 | -2.51 | -3.02 | -3.00 | -1.79 | -2.47 | -2.33 | -2.89 | -2.24 | -2.35 | -2.05 | -1.57 | -1.69 | -2.70 | -1.90 | -2.13 | -1.79 | -2.82 | -1.10 | -1.89 | -1.74 | -1.45 | -1.91 | -1.94 | -1.81 | -0.89 | -1.98 | -1.43 | 0.02047  |         |
| Pro-Lys       | -1.61 | -1.81 | -2.11 | -1.44 | -3.59 | -1.66 | -1.74 | -2.27 | -1.21 | -1.69 | -1.69 | -3.27 | -1.69 | -1.70 | -2.02 | -0.91 | -1.14 | -1.33 | -1.26 | -1.66 | -1.17 | -2.43 | -1.79 | 0.54  | -1.59 | 0.22  | -0.70 | -0.72 | -1.04 | -1.27 | -0.37 | -0.31 | -0.77    | 0.02263 |
| Asp-Leu       | -1.27 | -2.02 | -2.29 | -1.56 | -2.28 | -1.54 | -1.80 | -2.20 | -1.23 | -2.31 | -1.79 | -2.65 | -1.94 | -2.07 | -1.95 | -1.06 | -1.39 | -1.22 | -1.16 | -1.69 | -1.03 | -2.84 | -0.97 | -0.46 | -1.84 | -0.69 | -0.69 | -1.30 | -1.44 | -0.76 | -0.71 | -1.16 | -0.02335 |         |
| Gly-His       | -2.57 | -1.93 | -2.47 | -2.02 | -3.70 | -2.63 | -2.57 | -2.62 | -1.63 | -2.33 | -2.33 | -2.68 | -2.32 | -2.31 | -2.59 | -1.55 | -1.88 | -2.37 | -1.51 | -2.31 | -2.16 | -2.52 |       |       |       |       |       |       |       |       |       |       |          |         |

|                    |       |       |       |       |       |       |       |       |         |       |       |       |       |       |       |       |       |       |       |       |       |       |       |       |       |       |       |       |       |       |       |       |          |          |
|--------------------|-------|-------|-------|-------|-------|-------|-------|-------|---------|-------|-------|-------|-------|-------|-------|-------|-------|-------|-------|-------|-------|-------|-------|-------|-------|-------|-------|-------|-------|-------|-------|-------|----------|----------|
| Fucose             | -0.61 | -1.17 | -2.07 | -1.93 | -3.27 | -2.47 | -0.87 | -2.33 | -1.16   | -2.20 | -1.73 | -2.46 | -1.99 | -2.01 | -1.69 | -1.35 | -1.53 | -2.27 | -1.29 | -1.73 | -1.06 | -2.82 | -2.71 | -0.37 | -1.39 | -0.73 | -1.94 | -1.71 | -1.58 | -1.34 | -0.27 | -0.24 | -0.75    | 0.03699  |
| Val-Asn            | -1.10 | -2.15 | -3.05 | -2.47 | -3.57 | -2.51 | -2.66 | -3.56 | -1.01   | -1.46 | -1.46 | -2.13 | -1.60 | -1.82 | -2.00 | -1.48 | -1.51 | -2.23 | -1.54 | -1.97 | -1.52 | -2.39 | -2.92 | -0.66 | -1.47 | -2.68 | -1.70 | -1.73 | -1.25 | -1.45 | -0.57 | -1.43 | 0.92     | 0.030851 |
| Gly-Val            | -2.95 | -2.34 | -2.66 | -1.82 | -2.88 | -2.45 | -2.69 | -3.01 | -1.51   | -1.91 | -1.91 | -2.60 | -2.06 | -2.41 | -2.26 | -1.99 | -1.63 | -2.51 | -1.82 | -2.26 | -2.14 | -2.79 | -2.65 | -0.79 | -1.99 | -2.39 | -1.73 | -1.74 | -1.97 | -1.69 | -0.78 | -2.27 | -1.25    | 0.030872 |
| Gly-Lys            | -2.45 | -2.08 | -2.87 | -1.99 | -3.16 | -2.75 | -2.59 | -3.73 | -1.58   | -2.41 | -2.41 | -2.78 | -2.29 | -3.21 | -2.42 | -1.54 | -1.61 | -2.34 | -1.78 | -2.86 | -2.33 | -2.95 | -3.04 | -1.17 | -1.95 | -1.97 | -1.50 | -1.38 | -1.61 | -1.66 | -0.87 | -1.86 | -1.27    | 0.032057 |
| Mannan             | 0.32  | -1.94 | -2.79 | -2.04 | -2.29 | -2.13 | -1.52 | -2.44 | -1.16   | -2.09 | -1.51 | -2.37 | -1.90 | -2.02 | -2.01 | -1.37 | -1.52 | -1.43 | -1.00 | -1.54 | -1.18 | -3.24 | -0.80 | -0.66 | -2.05 | -0.20 | -0.88 | -3.00 | -2.02 | -1.35 | -0.75 | -0.20 | -1.07    | 0.033795 |
| Butanone           | -2.52 | -1.89 | -2.51 | -2.40 | -3.01 | -2.37 | -1.62 | -2.37 | -1.40   | -2.08 | -1.93 | -2.51 | -1.99 | -1.74 | -2.16 | -1.29 | -1.41 | -2.34 | -1.49 | -2.27 | -1.17 | -2.91 | -2.67 | -0.50 | -1.41 | -2.11 | -1.49 | -2.05 | -1.61 | -1.43 | -0.62 | -0.49 | -1.65    | 0.034752 |
| Met-Glu            | -3.08 | -1.60 | -2.99 | -2.70 | -3.44 | -2.70 | -2.67 | -3.72 | -1.31   | -2.34 | -2.34 | -2.20 | -2.87 | -2.51 | -2.82 | -2.49 | -2.15 | -2.88 | -2.34 | -3.24 | -2.13 | -2.91 | -2.73 | -2.02 | -1.73 | -2.35 | -2.21 | -2.31 | -1.81 | -2.43 | -0.79 | -1.87 | -0.87    | 0.035346 |
| Glu-Gly            | -2.09 | -1.81 | -2.87 | -2.70 | -3.54 | -2.60 | -2.82 | -3.25 | -1.47   | -2.01 | -2.18 | -2.16 | -2.41 | -2.60 | -2.57 | -1.63 | -1.40 | -2.75 | -1.98 | -2.06 | -1.57 | -2.47 | -3.07 | -1.26 | -1.70 | -2.70 | -2.05 | -2.08 | -2.11 | -1.87 | -1.16 | -2.00 | -1.19    | 0.036291 |
| Ile-Ala            | -2.50 | -2.01 | -2.43 | -1.79 | -3.21 | -2.33 | -2.40 | -2.62 | -1.33   | -1.78 | -1.78 | -2.57 | -1.91 | -2.03 | -2.13 | -1.47 | -1.70 | -1.99 | -1.39 | -2.16 | -2.01 | -2.66 | -2.90 | -0.54 | -1.63 | -2.83 | -1.06 | -1.51 | -1.66 | -1.42 | -0.40 | -0.94 | -0.71    | 0.036322 |
| Inositol           | -2.30 | -2.06 | -2.39 | -2.14 | -3.21 | -2.90 | -1.73 | -2.39 | -1.38   | -1.11 | -1.67 | -2.42 | -1.89 | -1.80 | -2.19 | -1.48 | -1.49 | -2.23 | -1.55 | -1.88 | -1.30 | -2.88 | -2.74 | -0.40 | -1.56 | -0.99 | -1.45 | -3.01 | -2.06 | -1.40 | -0.72 | -0.20 | -1.30    | 0.036514 |
| Leu-Tyr            | -1.20 | -1.82 | -1.97 | -1.43 | -3.63 | -1.54 | -1.58 | -1.94 | -1.22   | -1.68 | -1.68 | -2.30 | -1.08 | -1.14 | -1.27 | -0.76 | -0.96 | -0.99 | -1.24 | -1.75 | -1.71 | -1.84 | -1.23 | -0.75 | -1.42 | -0.14 | -0.72 | -0.54 | -1.41 | -1.56 | -0.60 | -0.86 | -1.11    | 0.037289 |
| Val-Ala            | -1.15 | -2.33 | -2.76 | -1.90 | -3.06 | -2.47 | -2.58 | -2.88 | -1.50   | -1.97 | -1.97 | -2.65 | -2.08 | -1.10 | -1.95 | -1.12 | -1.62 | -1.99 | -1.64 | -2.33 | -1.46 | -2.84 | -2.91 | -0.96 | -1.85 | -1.98 | -1.70 | -1.78 | -1.69 | -1.65 | -0.75 | -1.47 | -1.17    | 0.037602 |
| Aminoethanol       | -2.39 | -1.83 | -2.90 | -2.59 | -3.44 | -2.58 | -1.64 | -2.95 | -1.02   | -1.67 | -1.43 | -1.98 | -1.61 | -1.58 | -1.78 | -1.06 | -1.11 | -1.81 | -1.23 | -2.18 | -1.50 | -2.84 | -2.78 | -1.09 | -1.06 | -1.91 | -1.77 | -1.05 | -1.34 | -1.02 | -0.49 | -0.50 | -1.10    | 0.037819 |
| Tween 20           | -3.84 | -3.35 | -3.47 | -3.01 | -3.51 | -2.88 | -2.64 | -3.74 | -3.13   | -3.21 | -3.02 | -3.44 | -3.05 | -3.84 | -3.47 | -3.80 | -3.34 | -3.68 | -3.22 | -3.27 | -3.31 | -3.35 | -3.37 | -3.92 | -3.78 | -3.38 | -3.49 | -3.74 | -4.88 | -4.27 | -3.51 | -3.49 | -4.13    | 0.038020 |
| Arg-Glu            | -2.47 | -1.60 | -2.58 | -2.38 | -3.63 | -2.55 | -2.65 | -3.08 | -1.10   | -1.60 | -1.60 | -1.86 | -1.75 | -1.94 | -2.22 | -2.76 | -1.16 | -1.27 | -2.62 | -1.29 | -1.71 | -1.22 | -1.94 | -2.86 | -0.20 | -1.45 | -2.26 | -1.15 | -2.81 | -2.58 | -1.46 | -1.83 | -0.72    | 0.038460 |
| Glu-Val            | -1.34 | -1.50 | -2.32 | -2.38 | -3.38 | -2.54 | -2.57 | -3.52 | -1.66   | -1.75 | -3.13 | -1.54 | -2.56 | -2.55 | -2.53 | -2.43 | -2.40 | -2.61 | -2.06 | -0.83 | -1.42 | -2.20 | -2.85 | -0.54 | -1.50 | -2.24 | -2.34 | -2.59 | -2.46 | -2.58 | -0.40 | -0.81 | -0.39    | 0.038940 |
| MethylGalactoside  | -2.77 | -1.89 | -2.65 | -1.90 | -2.97 | -2.67 | -1.68 | -2.24 | -1.37   | -2.21 | -1.77 | -2.26 | -1.85 | -1.98 | -2.94 | -1.45 | -1.59 | -2.29 | -1.49 | -1.48 | -1.14 | -2.66 | -2.69 | -0.58 | -1.54 | -1.14 | -1.57 | -2.90 | -1.75 | -1.46 | -0.51 | -0.46 | -1.17    | 0.039040 |
| Gly-Phe            | -2.70 | -2.43 | -2.99 | -2.82 | -2.98 | -2.73 | -2.63 | -3.20 | -2.40   | -2.74 | -2.74 | -3.29 | -2.78 | -3.16 | -2.58 | -1.60 | -2.01 | -2.26 | -1.87 | -3.21 | -2.92 | -3.25 | -3.17 | -1.54 | -2.51 | -2.54 | -1.88 | -1.94 | -2.07 | -1.89 | -1.22 | -2.10 | -1.54    | 0.039091 |
| Phe-Asp            | -3.28 | -2.14 | -3.15 | -2.86 | -3.24 | -3.06 | -2.79 | -3.56 | -2.23   | -2.51 | -2.51 | -3.01 | -3.02 | -3.04 | -3.29 | -1.92 | -2.03 | -2.93 | -2.84 | -3.51 | -2.53 | -2.94 | -2.99 | -1.33 | -2.04 | -2.99 | -2.51 | -2.70 | -2.36 | -1.20 | -1.25 | -2.57 | -1.36    | 0.040879 |
| Pro-Tyr            | -1.30 | -1.52 | -1.28 | -0.94 | -1.60 | -1.17 | -1.03 | -1.45 | -0.58   | -1.06 | -1.06 | -1.45 | -1.16 | -0.34 | -0.93 | -0.52 | -0.50 | -1.16 | -1.05 | -1.45 | -0.58 | -1.20 | -1.01 | -0.08 | -0.83 | 0.31  | -0.34 | -0.22 | -0.94 | -1.19 | -0.15 | -0.49 | -0.61    | 0.041660 |
| Asparagine         | -2.87 | -3.14 | -2.47 | -2.99 | -3.32 | -2.87 | -3.72 | -3.06 | -1.14   | -1.64 | -1.49 | -1.91 | -1.64 | -1.98 | -2.15 | -1.27 | -1.20 | -2.02 | -1.29 | -2.47 | -1.39 | -2.36 | -2.93 | -0.61 | -1.54 | -2.42 | -1.91 | -1.55 | -1.51 | -1.30 | -0.62 | -1.67 | -0.73    | 0.042875 |
| Val-Pro            | -1.46 | -2.06 | -2.79 | -2.98 | -3.64 | -2.51 | -2.72 | -3.54 | -1.16   | -2.05 | -2.05 | -2.27 | -2.01 | -2.04 | -1.83 | -1.15 | -1.61 | -2.86 | -1.99 | -1.82 | -1.50 | -2.43 | -2.37 | -1.01 | -1.67 | -2.68 | -1.93 | -1.15 | -1.18 | -2.74 | -0.73 | -1.23 | -0.97    | 0.043017 |
| Gelatin            | -2.06 | -1.76 | -1.98 | -1.88 | -1.95 | -2.39 | -2.42 | -1.79 | -1.49   | -1.56 | -1.64 | -1.96 | -1.84 | -2.15 | -1.44 | -1.71 | -1.16 | -1.16 | -1.81 | -1.56 | -2.85 | -2.74 | -0.82 | -1.77 | -0.92 | -0.40 | -1.75 | -1.87 | -0.70 | -0.87 | -0.62 | -0.74 | -0.47    | 0.043560 |
| Leu-Ala            | -1.37 | -1.99 | -2.65 | -1.70 | -3.21 | -1.56 | -1.70 | -2.51 | -1.67   | -2.06 | -2.06 | -2.84 | -2.10 | -2.47 | -1.90 | -0.91 | -1.36 | -1.06 | -1.33 | -1.93 | -2.44 | -2.87 | -2.31 | -0.74 | -1.85 | 0.04  | -0.72 | -0.96 | -1.27 | -1.81 | -0.64 | -0.81 | -1.16    | 0.043818 |
| His-Ala            | -2.11 | -2.21 | -2.58 | -2.01 | -0.78 | -2.51 | -2.48 | -2.85 | -1.91   | -2.46 | -2.46 | -3.06 | -2.72 | -2.38 | -2.25 | -1.45 | -1.62 | -1.99 | -1.66 | -2.51 | -2.52 | -2.72 | -2.73 | -1.03 | -1.94 | -1.52 | -1.70 | -1.44 | -1.79 | -1.56 | -0.74 | -1.72 | -1.24    | 0.043829 |
| Val-Phe            | -1.17 | -2.42 | -3.06 | -3.20 | -3.56 | -2.75 | -2.63 | -4.01 | -2.18   | -2.38 | -2.38 | -2.94 | -2.85 | -2.49 | -2.40 | -1.19 | -2.19 | -3.28 | -2.08 | -1.93 | -2.36 | -3.13 | -2.79 | -1.04 | -2.15 | -3.05 | -2.20 | -2.97 | -1.55 | -2.42 | -1.35 | -1.45 | 0.043887 |          |
| MethylGlucoside    | -1.99 | -1.80 | -2.74 | -2.22 | -3.06 | -1.64 | -1.70 | -2.76 | -1.15   | -1.18 | -1.79 | -2.21 | -1.94 | -1.68 | -2.06 | -1.40 | -1.19 | -3.28 | -2.34 | -2.14 | -2.14 | -2.84 | -2.67 | -0.53 | -1.38 | -1.60 | -2.00 | -1.51 | -1.04 | -0.37 | -1.26 | -0.44 | -0.75    | 0.044075 |
| Val-Gln            | 0.31  | -0.84 | -1.04 | 0.16  | -2.01 | -0.52 | -0.68 | -1.45 | 0.16    | -0.44 | -0.44 | -0.61 | -0.12 | -0.44 | -0.49 | -0.76 | -0.54 | -0.38 | -0.08 | -0.49 | -0.30 | -0.91 | -0.80 | -0.40 | -0.42 | -0.33 | 0.37  | -0.37 | -0.50 | -0.19 | 0.66  | -0.29 | 0.15     | 0.044403 |
| Tyr-Phe            | -1.77 | -2.24 | -2.35 | -2.20 | -2.98 | -2.31 | -1.11 | -2.57 | -1.52   | -1.74 | -1.74 | -2.43 | -1.60 | -1.43 | -1.75 | -2.07 | -1.56 | -2.06 | -1.67 | -2.14 | -2.25 | -2.24 | -2.25 | -0.98 | -1.74 | -1.88 | -1.66 | -1.66 | -1.65 | -1.79 | -0.64 | -1.47 | -1.18    | 0.044516 |
| Gly-Gly            | -2.19 | -1.16 | -2.11 | -2.05 | -3.41 | -2.56 | -2.79 | -2.80 | -1.43   | -1.27 | -1.43 | -2.27 | -1.63 | -2.21 | -2.47 | -1.57 | -1.70 | -2.43 | -2.03 | -2.71 | -2.76 | -2.73 | -2.85 | -0.83 | -1.99 | -1.69 | -1.69 | -1.69 | -1.84 | -1.88 | -1.31 | -0.44 | -0.81    | 0.044623 |
| Glutamic Acid      | 2.88  | -1.25 | -2.77 | 2.06  | -3.41 | -2.60 | -2.85 | -3.37 | -1.98   | -2.08 | -3.13 | -2.13 | -2.32 | -2.47 | -2.50 | -2.45 | -2.51 | -2.82 | -1.46 | -2.10 | -3.21 | -3.27 | -2.83 | -2.70 | -2.40 | -2.07 | -2.93 | -0.07 | -2.15 | -0.44 | -0.72 | -0.45 | -0.14    | 0.045011 |
| Met-Phe            | -3.32 | -2.06 | -2.99 | -2.54 | -2.56 | -2.91 | -2.61 | -3.54 | -2.78   | -2.40 | -2.94 | -2.84 | -2.88 | -2.81 | -2.10 | -2.15 | -2.64 | -1.10 | -3.21 | -3.27 | -2.83 | -2.70 | -1.47 | -2.02 | -2.60 | -2.06 | -2.70 | -1.91 | -2.01 | -1.16 | -2.37 | -1.27 | -0.50    | 0.045931 |
| Stachyose          | -2.09 | -1.65 | -2.39 | -2.10 | -3.01 | -2.61 | -0.46 | -2.11 | -1.23   | -2.02 | -1.69 | -2.50 | -1.94 | -1.81 | -2.04 | -1.28 | -1.38 | -2.17 | -1.33 | -1.84 | -1.22 | -3.17 | -2.59 | -0.48 | -1.46 | -0.78 | -1.20 | -1.87 | -1.69 | -1.71 | -0.37 | -0.10 | -0.97    | 0.046196 |
| Asp-Asp            | -3.06 | -1.95 | -2.86 | -2.47 | -3.61 | -2.85 | -2.84 | -2.85 | -1.58   | -2.10 | -1.84 | -2.45 | -1.97 | -2.20 | -2.26 | -1.38 | -1.25 | -2.02 | -1.47 | -1.92 | -1.38 | -2.76 | -2.79 | -0.72 | -1.72 | -2.67 | -2.72 | -1.51 | -2.04 | -1.75 | -0.77 | -2.04 | -1.20    | 0.047147 |
| Keto-Glutaric Acid | -3.22 | -1.33 | -1.88 | -1.04 | -2.56 | -2.56 | -0.59 | -1.29 | -0.51   | -1.37 | -1.25 | -1.63 | -1.18 | -0.73 | -1.71 | 0.97  | -0.87 | -1.54 | -0.64 | -1.69 | -0.49 | -1.64 | -2.26 | 0.11  | -1.12 | -0.70 | -0.28 | -0.89 | -1.10 | -0.17 | -0.15 | -0.50 | 0.048046 |          |
| Phe-Gly            | -2.25 | -2.47 | -2.98 | -2.94 | -3.38 | -2.80 | -2.64 | -3.44 | -2.30   | -2.78 | -2.78 | -3.25 | -3.02 | -3.61 | -2.61 | -0.12 | -2.52 | -2.85 | -1.87 | -2.76 | -2.46 | -3.37 | -3.10 | -1.33 | -2.47 | -2.34 | -1.80 | -2.05 | -1.79 | -1.07 | -1.37 | -2.20 | -1.56    | 0.049065 |
| His-Asp            | -2.46 | -2.02 | -2.12 | -2.04 | -2.94 | -2.56 | -2.61 | -2.73 | -1.37   | -1.74 | -1.74 | -2.54 | -1.73 | -2.21 | -2.09 | -1.56 | -1.54 | -2.40 | -1.27 | -2.02 | -2.16 | -2.34 | -2.68 | -0.35 | -1.76 | -3.17 | -1.22 | -1.64 | -1.91 | -1.44 | -0.53 | -1.49 | -1.16    | 0.050973 |
| Propanediol        | -2.42 | -1.88 | -2.53 | -1.71 | -3.25 | -3.06 | -1.98 | -2.75 | -1.39   | -2.13 | -2.01 | -2.38 | -1.87 | -1.96 | -1.80 | -1.41 | -1.46 | -2.29 | -1.61 | -2.05 | -1.75 | -2.71 | -2.87 | -0.59 | -1.38 | -1.81 | -1.68 | -2.68 | -1.89 | -1.57 | -0.41 | -0.97 | 0.051011 |          |
| Mannitol           | 0.65  | -2.01 | -2.58 | -1.88 | -3.25 | -2.35 | -1.16 | -2.34 | -1.41</ |       |       |       |       |       |       |       |       |       |       |       |       |       |       |       |       |       |       |       |       |       |       |       |          |          |
